# Supplementary material for: Elevated KRAS protein level is associated with better survival in pancreatic cancer
Source: Research Square preprint supplement (doi:10.21203/rs.3.rs-6542241/v1), 2025-05-13
Supplement: Supplementary file 1 [file 51aed2a1d9affe67587c4fee.xlsx]

## Sheet: Ark1
	Additional file 4. Associations between clinicopathological variables and KRAS status and overall survival in patients with PDAC.
		Univariable Cox Regression
	Variables:	Hazards ratio (HR)	95 % CI of HR	p-value
	Age at diagnosis (continous)	1.01	0.97-1.05	0.66
	Gender
	Female	1.00
	Male	1.15	0.58-2.25	0.695
	Tumor size (continous)	1.07	0.79-1.44	0.664
	Resection margin
	Free	1.00
	Not free	1.20	0.61-2.37	0.602
	Differentiation
	Low	1.00
	Middle	0.68	0.33-1.37	0.278
	Blood type
	A	1.00
	B	3.25	0.72-14.72	0.126
	O	1.45	0.63-3.30	0.380
	TNM T
	T3	1.00
	T2	1.25	0.29-5.34	0.767
	T1	0.64	0.19-2.11	0.459
	TNM N
	Negative	1.00
	Positive	1.30	0.60-2.83	0.507
	CA19-9
	Below median	1.00
	Above median	1.51	0.58-3.89	0.398
	KRAS mutation status
	G12D	1.00
	G12V	2.26	1.00-5.11	0.049
	G12R	0.37	0.08-1.64	0.189
	G12C	0.96	0.21-4.39	0.962
	Wildtype	1.16	0.41-3.30	0.774
	KRAS protein level
	Above median	1.00
	Below median	3.12	1.43-6.81	0.004
	KRAS mRNA expression
	Above median	1.00
	Below median	0.58	0.29-1.16	0.123
	Univariable Cox Regression model for patients with PDAC (N=36). Three patients without overlapping protein and mRNA data, one patient with metastasis at diagnosis, and one patient with non-standard treatment were excluded from the analysis. P-values < 0.05 are in bold. CI=Confidence Interval. * One patient with tumor with high differentiation is not illustrated in this table. ** No CA19-9 values …
