# Supplementary material for: Elevated KRAS protein level is associated with better survival in pancreatic cancer
Source: Research Square preprint supplement (doi:10.21203/rs.3.rs-6542241/v1), 2025-05-13
Supplement: Supplementary file 2 [file 968dca88a817f0f5d88e63af.xlsx]

## Sheet: Ark1
	Additional file 11. Correlations between KRAS and the other members of the RAS family on protein level.
	Gene	Correlation coefficient	Adjusted p-value
	GEM	-0.208	0.447
	MRAS	0.096	0.823
	NKIRAS2	0.347	0.153
	RALA	0.234	0.388
	RALB	0.511	0.012
	RAP1A	-0.086	0.823
	RAP1B	0.131	0.713
	RAP2A	0.060	0.896
	RAP2B	-0.045	0.907
	RAP2C	0.028	0.927
	RERG	-0.260	0.335
	RRAS	0.282	0.304
	RRAS2	0.016	0.927
	HRAS	0.140	0.713
	NRAS	0.363	0.153
	KRAS	1.000	0.000
	The correlation was performed by Pearson correlation formula. The p-values were adjusted by Benjamini-Hochberg method (FDR). Correlation coefficients above 0.5 and p-values < 0.05 are in bold. Three patients without overlapping protein and mRNA data, one patient with metastasis at diagnosis, and one patient with non-standard treatment were excluded from the analysis.
