# Supplementary material for: Elevated KRAS protein level is associated with better survival in pancreatic cancer
Source: Research Square preprint supplement (doi:10.21203/rs.3.rs-6542241/v1), 2025-05-13
Supplement: Supplementary file 3 [file 9b5b6aecc7c5265e809a4234.xlsx]

## Sheet: Ark1
	Additional file 5. Associations between KRAS mutation status and KRAS protein level and overall survival in patients with PDAC.
		Multivariable Cox Regression
	Variables	Hazards ratio (HR)	95% CI of HR	p-value
	KRAS mutation status
	G12D	1.00
	G12V	3.12	1.35-7.22	0.008
	G12R	0.31	0.07-1.46	0.140
	G12C	1.45	0.30-6.94	0.640
	Wildtype	1.38	0.48-3.97	0.549
	KRAS protein level
	Above median	1.00
	Below median	4.62	1.91-11.16	<0.001
	Multivariable Cox Regression model with stepwise regression algorithm with backwards elimination for patients with PDAC (N=36). Selection of variables based on univariable Cox regression model (Table S2). Three patients without overlapping protein and mRNA data, one patient with metastasis at diagnosis, and one patient with non-standard treatment were excluded from the analysis. P-values < 0.05 a…
