# Supplementary material for: Elevated KRAS protein level is associated with better survival in pancreatic cancer
Source: Research Square preprint supplement (doi:10.21203/rs.3.rs-6542241/v1), 2025-05-13
Supplement: Supplementary file 4 [file b2edc5fdf01664a377091dea.xlsx]

## Sheet: Ark1
	Additional file 9. Correlations between KRAS and the other members of the RAS family on mRNA expression level.
	Gene	Correlation coefficient	Adjusted p-value
	GEM	0.245	0.184
	MRAS	0.060	0.776
	NKIRAS2	0.515	0.005
	RALA	0.508	0.005
	RALB	0.350	0.059
	RAP1A	0.379	0.045
	RAP1B	0.280	0.131
	RAP2A	0.357	0.058
	RAP2B	0.283	0.131
	RAP2C	0.536	0.005
	RERG	-0.029	0.866
	RRAS	0.429	0.021
	RRAS2	0.115	0.575
	HRAS	0.484	0.007
	NRAS	0.518	0.005
	KRAS	1.000	0.000
	The correlation was performed by Pearson correlation formula. The p-values were adjusted by Benjamini-Hochberg method (FDR). Correlation coefficients above 0.5 and p-values < 0.05 are in bold. Three patients without overlapping protein and mRNA data, one patient with metastasis at diagnosis, and one patient with non-standard treatment were excluded from the analysis.
